# Supplementary material for: The Biphasic Effect of Flavonoids on Oxidative Stress and Cell Proliferation in Breast Cancer Cells
Source: MDPI journal article supplement (doi:10.3390/antiox11040622), 2022-03-24
Supplement: s1 [file s1]

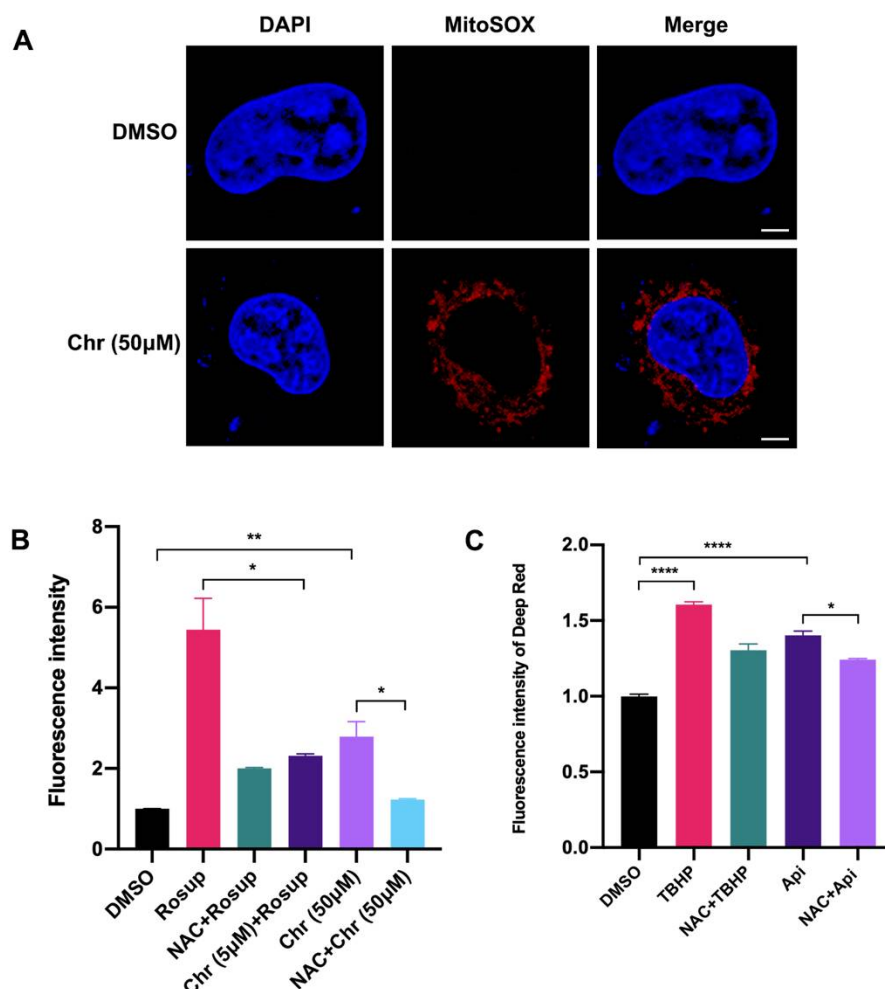

**Figure S1: (A)** The staining of mitochondria superoxide with MitoSOX Red Indicator. Cells were treated with DMSO or 50  $\mu$ M chrysin for 24 h, stained and observed under a laser confocal microscope. Mitochondria superoxide (red) and nuclear DNA stained with DAPI (blue) was showed. **(B)** Fluorescence intensity of ROS detected by flow cytometry with DCFH-DA assay. Rosup: 50  $\mu$ g/ml for 24 h. NAC + Rosup: pretreated with 5  $\mu$ M NAC for 6 h thereafter 50  $\mu$ g/ml Rosup for 18 h. Chr (5  $\mu$ M) + Rosup: pretreated with 5  $\mu$ M chrysin for 6 h thereafter 50  $\mu$ g/ml Rosup for 18 h. Chr (50  $\mu$ M): treated with 50  $\mu$ M chrysin for 24 h. NAC + Chr (50  $\mu$ M): pretreated with 5  $\mu$ M NAC for 6 h thereafter 50  $\mu$ M chrysin for 18 h. **(C)** Fluorescence intensity of oxidative stress detected by flow cytometry with CellROX Deep Red probe. TBHP: treated with 250  $\mu$ M TBHP for 2 h (positive control). NAC + TBHP: pretreated with 1 mM NAC for 1 h thereafter 250  $\mu$ M TBHP for 2 h. Api: treated with 100  $\mu$ M apigenin for 2 h. NAC + Api: pretreated with 1 mM NAC for 1 h thereafter 100  $\mu$ M apigenin for 2 h.

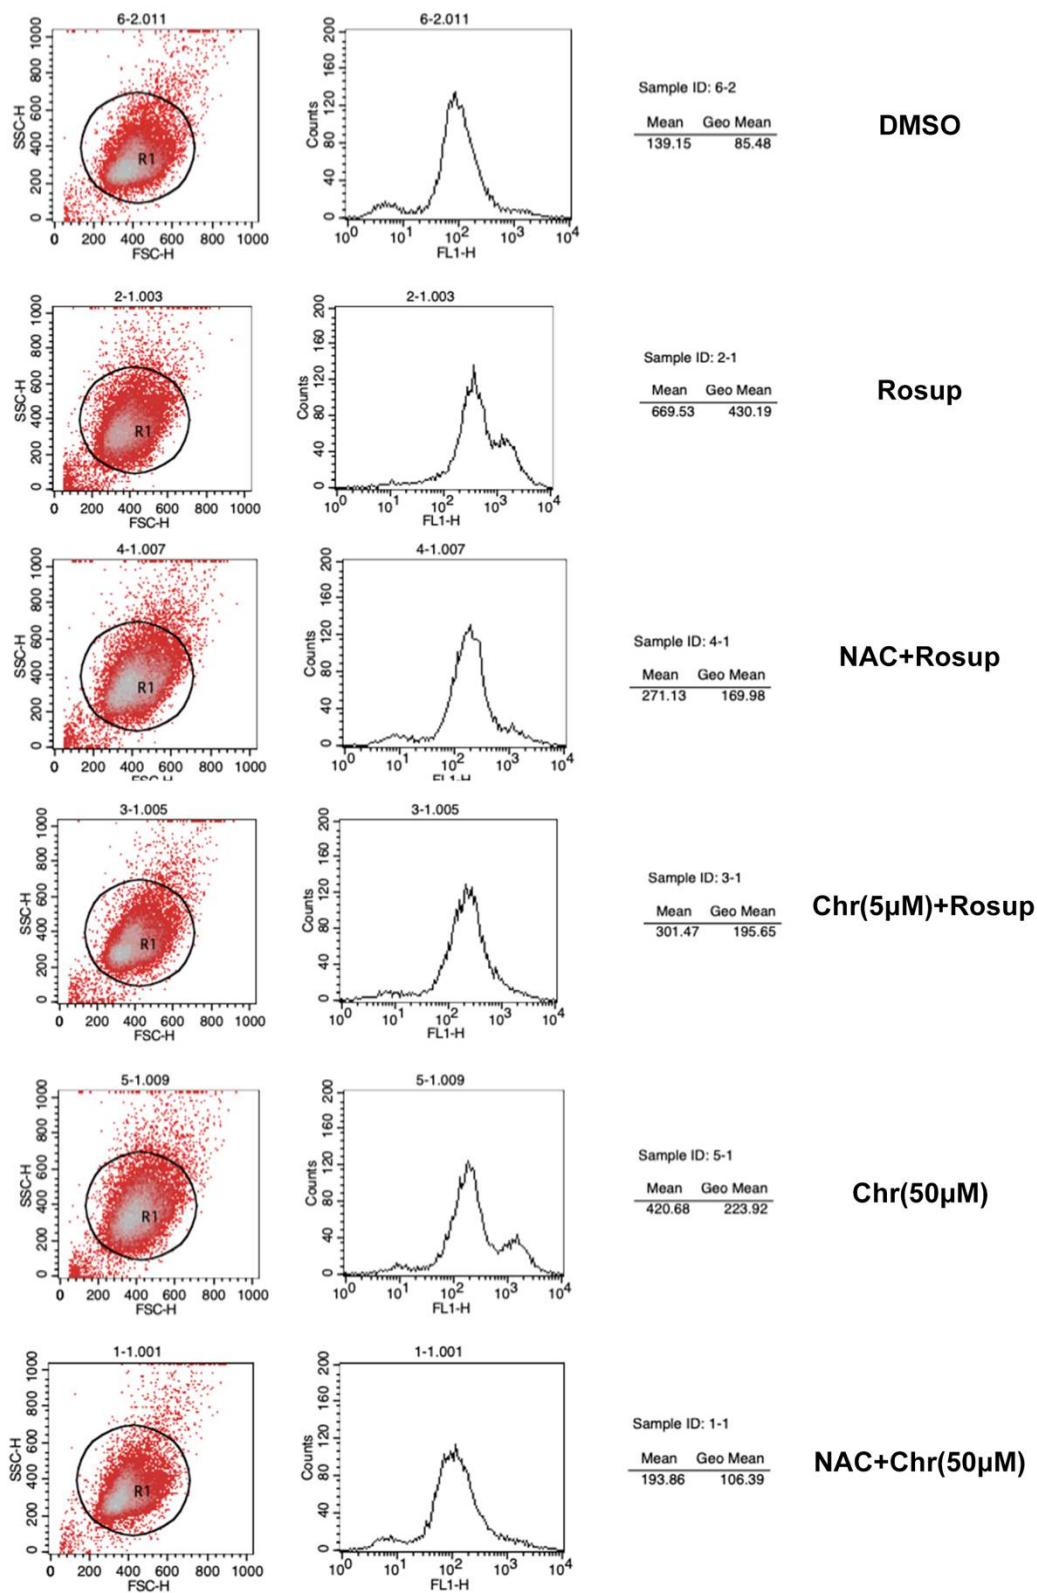

**Figure S2** The flow cytometry results of **Figure S1B**.

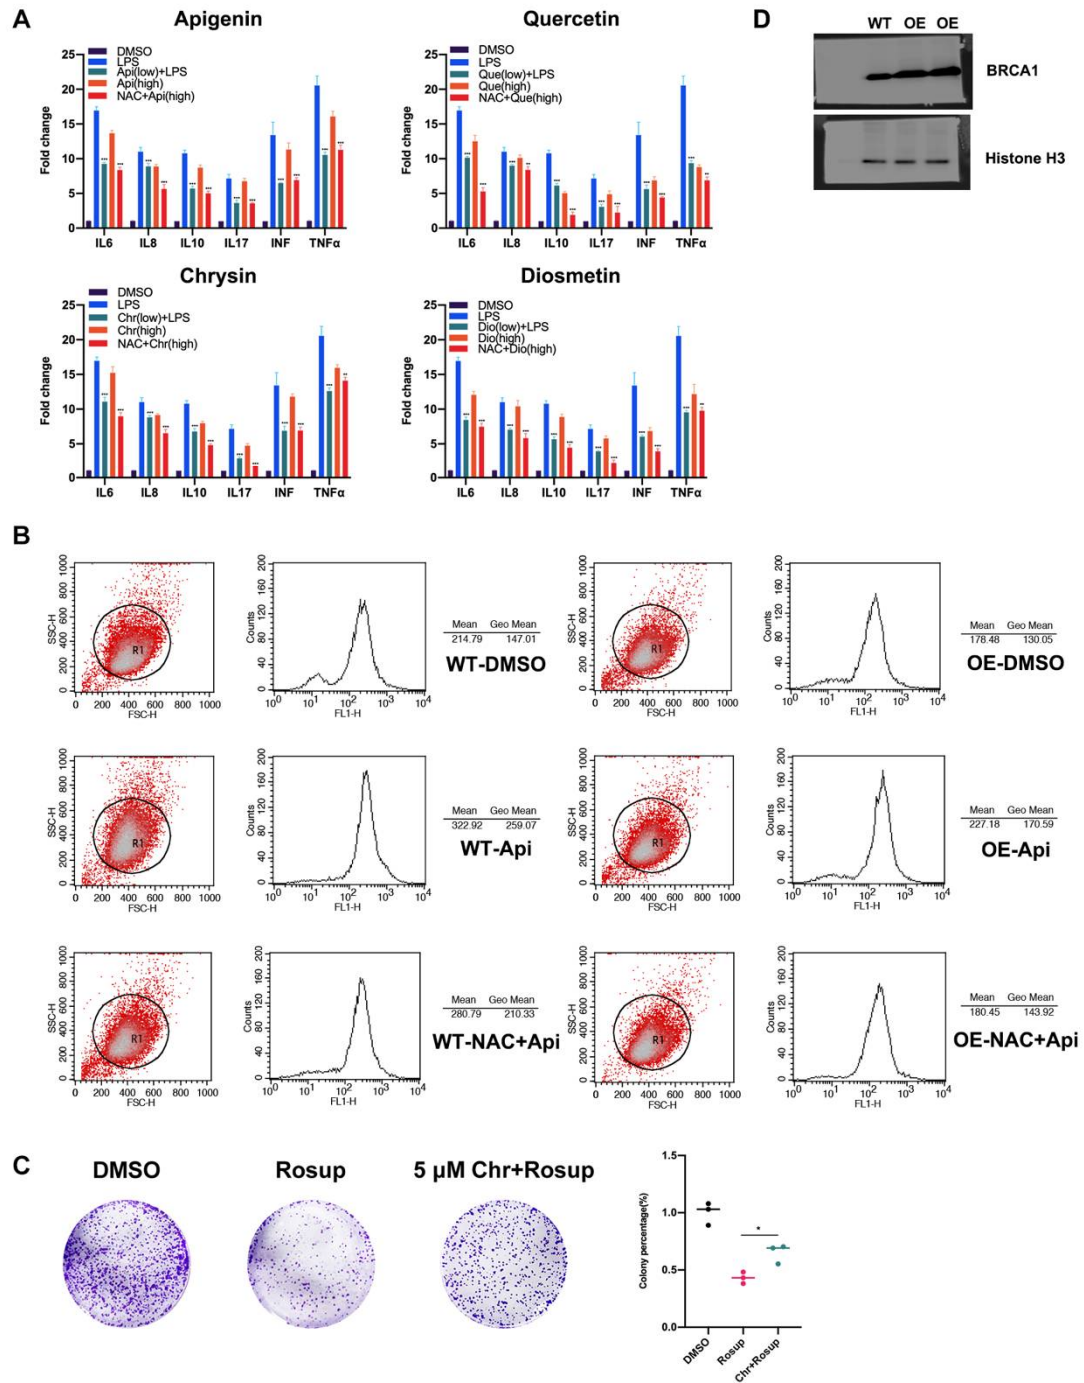

**Figure S3:** (A) The qPCR results of relevant inflammatory genes in RAW 264.7 macrophages treated with four flavonoids, respectively. LPS: 5  $\mu$ g/ml LPS for 24 h. Low dose means 5  $\mu$ M and high dose means 50  $\mu$ M. NAC pretreatment was 6 h thereafter 18 h of flavonoids treatment. (B) The original flow cytometry plots of Figure 8D. (C) The colony formation of Rosup and Chr (5  $\mu$ M) + Rosup in MCF-7 cells. The treatment was described before. (D) The original WB gels for BRCA1 overexpression. The gels were cropped according to the targeted protein molecular, respectively.

**Table S1 The qPCR primers of detected genes**

| GENE NAME     | Accession<br>number | F-primer (5'-3')        | R-primer (5'-3')          |
|---------------|---------------------|-------------------------|---------------------------|
| SOD2          | NM_000636.4         | TGTTGGAGACCTGGGCAATG    | CTCTGCCCAAGTCATCTGGTT     |
| CAT           | NM_001752.4         | TCACTCAGGTGCGGACTTTC    | TGGATGCGGGAGCCATATTC      |
| NQO1          | NM_000903.3         | CAACAGACCAGCCAATCA      | ACCTCCCATCCTTTCCTC        |
| GPX1          | NM_000581.4         | CTTCAACCTGTCTCCCT       | GGTCATTTCATCTGGGTGT       |
| TXNRD1        | NM_182729.3         | GTGTGAATGTGGGTTCATACC   | TCCTCGACGTCCACCCATA       |
| NRF2          | NM_006164.5         | AGGACATGGATTGTGATT      | TACCTGGGAGTAGTTGGCA       |
| GSR           | NM_000637.5         | CGCTGAGAACCCAGAG        | AAACGGAAAGTGGGAACAGTAAGTA |
| GSS           | NM_000178.4         | CGAGTGATCCAATGCAT       | ATGTCCCACGTGCTTGTTTCAT    |
| GSTP1         | NM_000852.4         | TTTGCGGACTACAACCTG      | CCCTCACTGTTTCCCAT         |
| GAPDH         | NM_002046.7         | GGGTCATCATCTCTGCACCT    | GGTCATAAGTCCCTCCACGA      |
| ACTB          | NM_001101.5         | GTCTCCTCTGACTTCAACAGCG  | ACCACCCTGTTGCTGTAGCCAA    |
| IL6           | NM_000600.5         | GGAGGAAAAGGACGGATGCT    | GGTCAGTGTTTGTGGCTGGA      |
| IL8           | NM_000584.4         | CCTCTTGTTCAATATGACTTCCA | GGCCCACTCTCAATAACTCTC     |
| IL10          | NM_000572.3         | AGCACTACTCTGTTGCCTGG    | TTGGGGTAGACTTTGGGGTCT     |
| IL17          | NM_002190.3         | AGATTACTACAACCGATCCACCT | GGGGACAGAGTTCATGTGGTA     |
| IFNGR1        | NM_000416.3         | AGCAGGAAGTCGATTATGATCCC | CTGGCACTGAATCTCGTCACA     |
| TNF- $\alpha$ | NM_000594.4         | CCTCTCTCTAATCAGCCCTCTG  | GAGGACCTGGGAGTAGATGAG     |

**Table S2 The information of flavonoids and antibodies**

| NAME                             | SOURCE                       | Cat No. |
|----------------------------------|------------------------------|---------|
| Apigenin                         | CHENGDU MUST, Chengdu, China | A0113   |
| Chrysin                          | CHENGDU MUST, Chengdu, China | A0292   |
| Diosmetin                        | CHENGDU MUST, Chengdu, China | A0927   |
| Quercetin                        | CHENGDU MUST, Chengdu, China | A0083   |
| Histone H3                       | Beyotime, Shanghai, China    | AF0009  |
| $\gamma$ -H2AX                   | Beyotime, Shanghai, China    | AF5836  |
| Hoechst 33342                    | Beyotime, Shanghai, China    | C1022   |
| BRCA1                            | Beyotime, Shanghai, China    | AF6339  |
| HRP-labeled Goat Anti-Rabbit IgG | Beyotime, Shanghai, China    | A0208   |
| HRP-labeled Goat Anti-Mouse IgG  | Beyotime, Shanghai, China    | A0216   |

**Table S3 The information of used cell lines**

| CELL LINE  | SPECIES             | TYPE          | SOURCE |
|------------|---------------------|---------------|--------|
| MCF-7      | <i>Homo sapiens</i> | Breast cancer | ATCC   |
| MDA-MB-231 | <i>Homo sapiens</i> | Breast cancer | ATCC   |
| 4T1        | <i>Mus musculus</i> | Breast cancer | ATCC   |
| RAW 264.7  | <i>Mus musculus</i> | Macrophage    | ATCC   |
